# Supplementary material
Source: PubMed Central journal article supplement (PMC4219164)

**Table 4. Population disease progression parameter estimates for albumin dynamics in TB and TB-HIV patients (base model).**

| parameter                                                     | HIV only |         | TB-HIV |         | Description                                                     |
|---------------------------------------------------------------|----------|---------|--------|---------|-----------------------------------------------------------------|
|                                                               | mean     | RSE (%) | mean   | RSE (%) |                                                                 |
| $Q_0$ (g/dl/hr)                                               | 0.0055   | 5       | 0.0037 | 2       | Baseline albumin secretion rate                                 |
| $Q_{ss}$ (g/dl/hr)                                            | 0.0061   | 17      | 0.0055 | 17      | Maximum albumin secretion rate                                  |
| R (1/hr)                                                      | 0.0003   | 69      | 0.0004 | 61      | Rate of change from $Q_0$ to $Q_{ss}$                           |
| K (1/hr)                                                      | 0.0014   | FIX     | 0.0014 | FIX     | Elimination rate constant for albumin                           |
| <b>Random effects parameters for both HIV only and TB-HIV</b> |          |         |        |         |                                                                 |
| IIV_ $Q_0$                                                    | 0.0269   | 12      |        |         | Inter-individual variability in baseline albumin secretion rate |
| Residual error(proportional)                                  | 0.0335   | 5       |        |         | Variability in the residual error                               |

**Table 5. Correlation matrix of the parameter estimates from the NONMEM covariance step.**

|            | $Q_0$    | $Q_{ss}$ | R        | OM11    | RESIDUAL |
|------------|----------|----------|----------|---------|----------|
| $Q_0$      | 1.13E-4  |          |          |         |          |
| $Q_{ss}$   | -2.72E-1 | 5.66E-4  |          |         |          |
| R          | 1.26E-1  | -6.89E-1 | 1.45E-4  |         |          |
| IIV_ $Q_0$ | 2.25E-1  | -4.71E-1 | 5.26E-1  | 1.03E-3 |          |
| RESIDUAL   | 7.21E-2  | -4.54E-2 | -1.05E-2 | 2.7E-1  | 3.77E-3  |

Figure 4. VPC of the validation dataset.

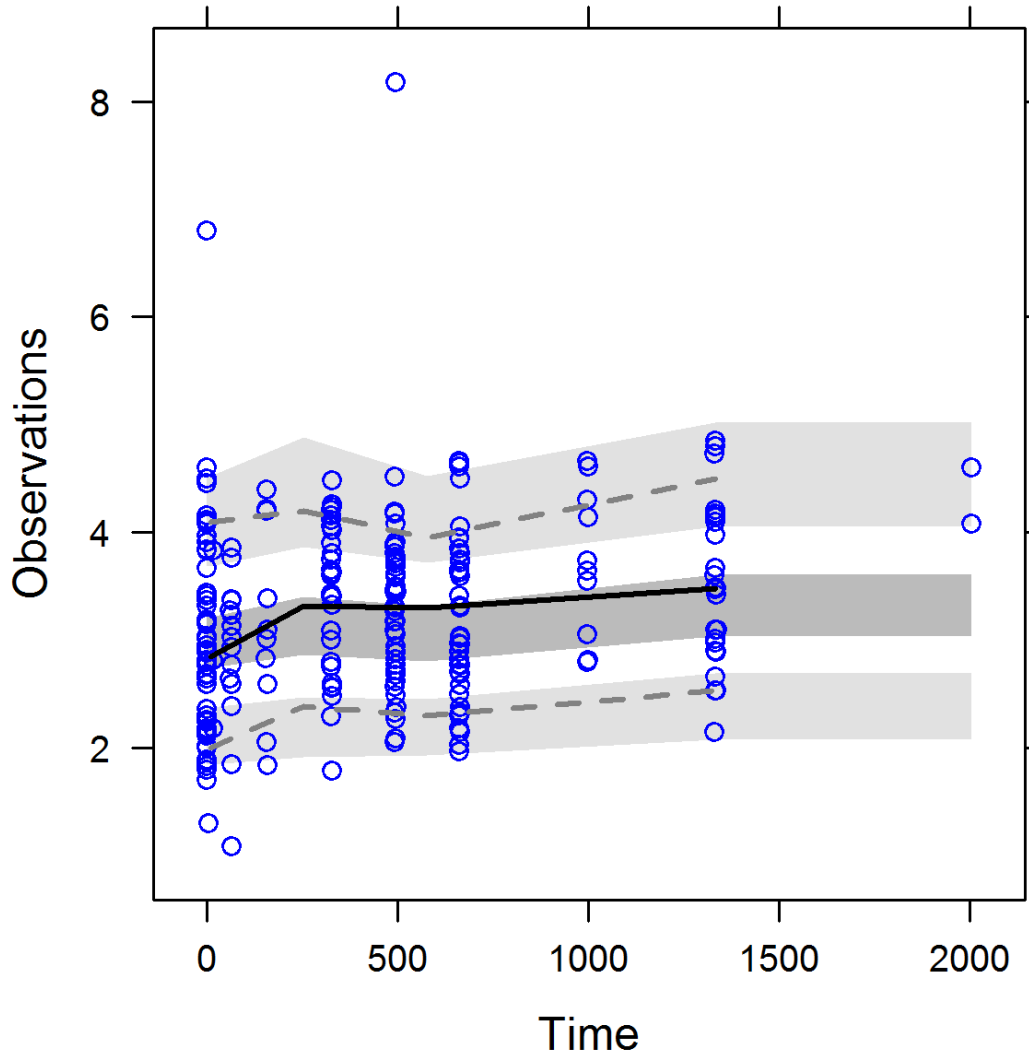

Figure 5. Parameter versus Parameter plots showing correlation between parameter estimates from 950 bootstrap estimates.

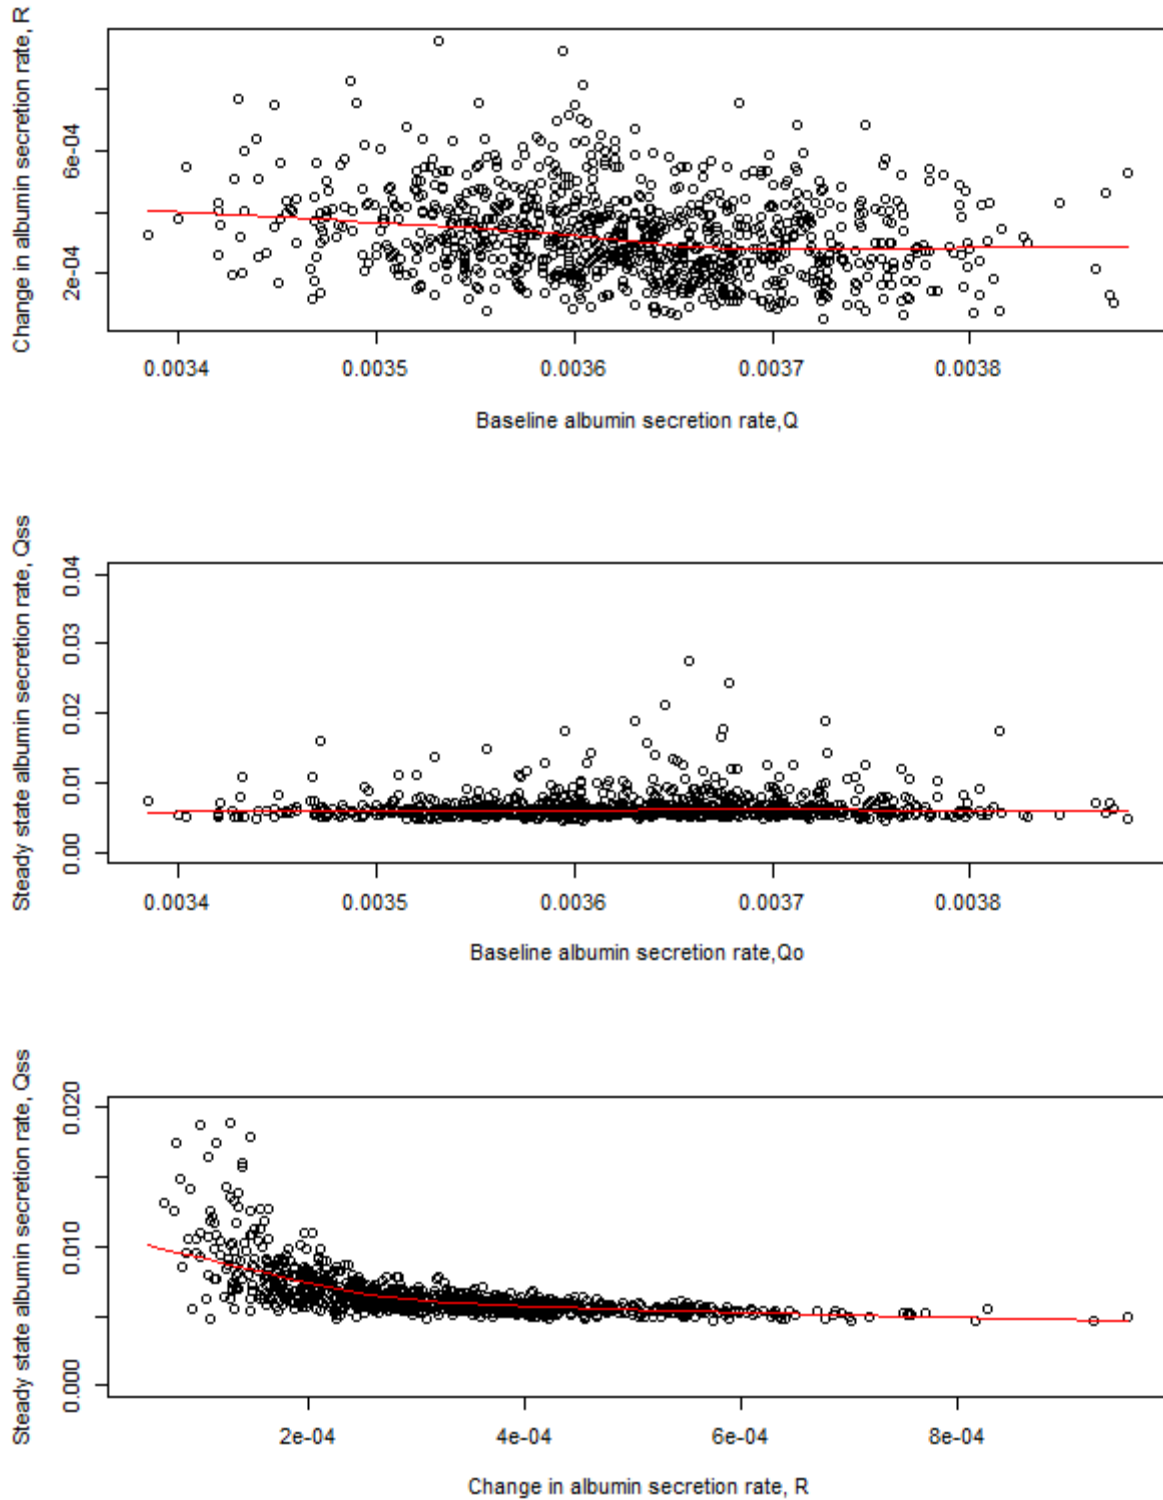

Figure 6. Inclusion frequency of covariates following 50 bootstraps of the stepwise covariate modeling.

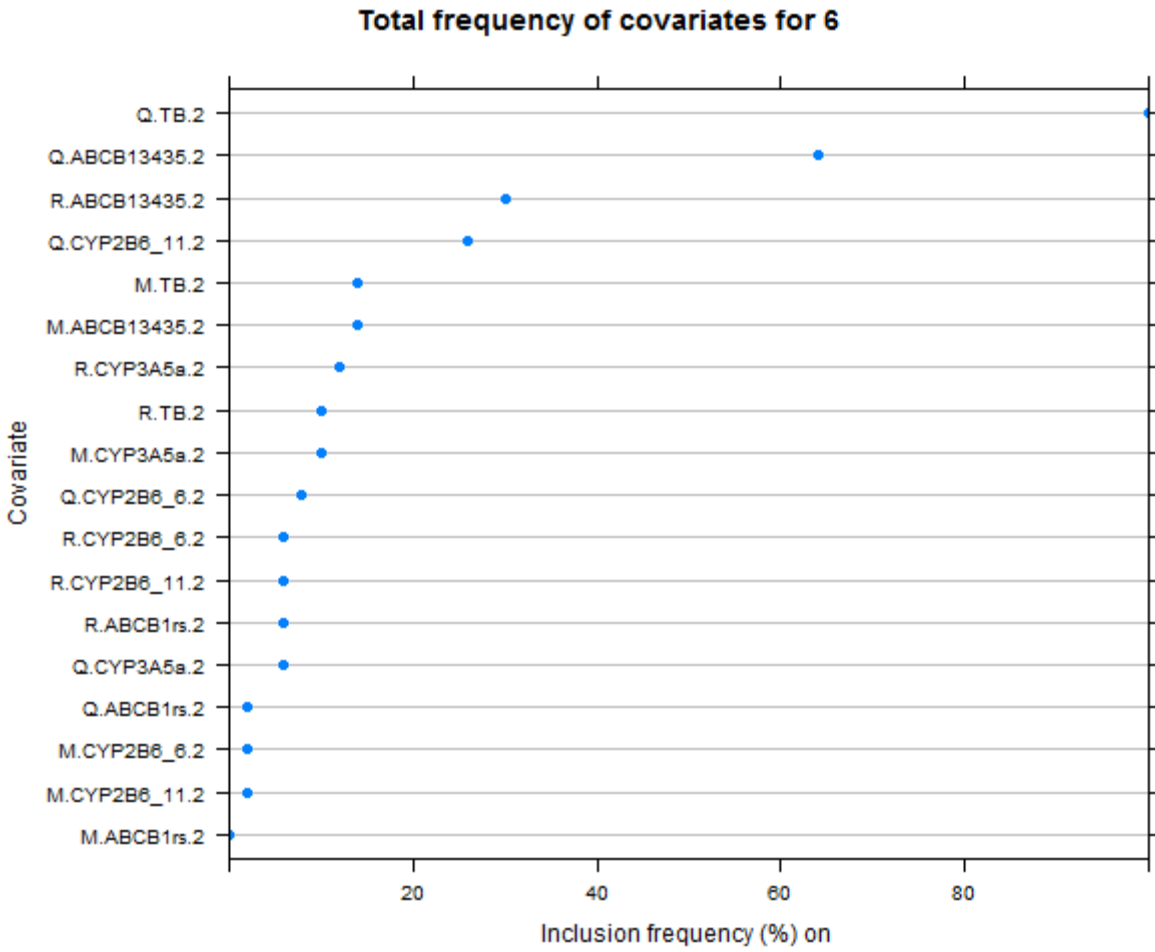

The Y axis represents "Parameter.covariate.relationship". e.g. Q.TB.2 means TB is a covariate on parameter Q with a proportional relationship. Q stands for  $Q_0$  M stands for  $Q_{SS}$ .

Figure 7. Goodness of fit plot using a simple exponential albumin production model.

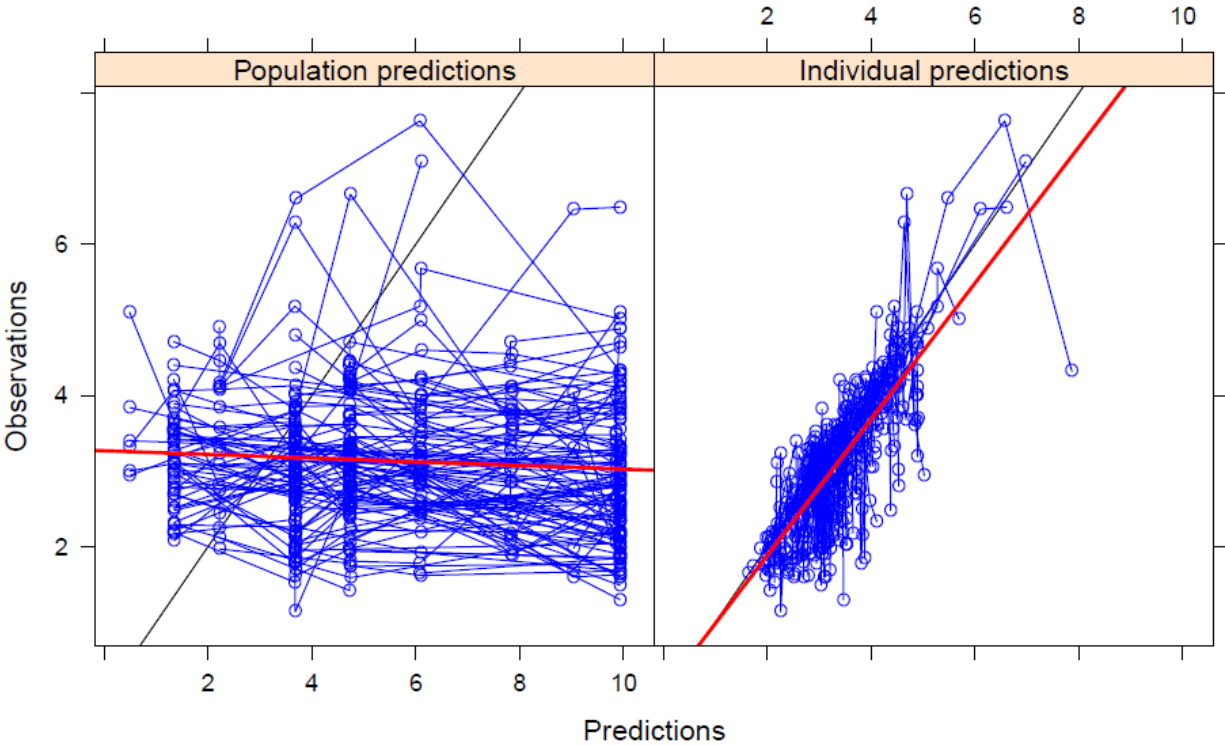

Supplement: 40203_2014_3_MOESM1_ESM.pdf [file 40203_2014_3_MOESM1_ESM.pdf]
